# Supplementary material
Source: PubMed Central journal article supplement (PMC6895039)
Supplement: 41386_2019_441_MOESM1_ESM.pdf [file 41386_2019_441_MOESM1_ESM.pdf]

**Supplementary Table 1. Expression of GABAergic neuronal markers in the mouse cortex.**

| <b>Gene</b>                          | <b>WT (mean FPKM)</b> | <b>Df/+ (mean FPKM)</b> | <b>P value</b> |
|--------------------------------------|-----------------------|-------------------------|----------------|
| <i>marker</i>                        |                       |                         |                |
| <i>Pvalb</i>                         | 61.19 ± 1.447         | 51.99 ± 0.816           | <b>0.017</b>   |
| <i>Cck</i>                           | 296.2 ± 10.33         | 283.0 ± 8.017           | 0.718          |
| <i>Sst</i>                           | 321.5 ± 11.97         | 319.8 ± 14.19           | 0.400          |
| <i>Vip</i>                           | 15.89 ± 0.289         | 15.21 ± 0.661           | 0.557          |
| <i>transporter</i>                   |                       |                         |                |
| <i>Slc6a1</i> (GAT1)                 | 106.8 ± 3.325         | 104.0 ± 2.059           | 0.580          |
| <i>Slc6a13</i> (GAT2)                | 6.534 ± 0.344         | 5.219 ± 0.181           | <b>0.021</b>   |
| <i>Slc6a11</i> (GAT3)                | 76.22 ± 4.705         | 71.73 ± 1.024           | 0.734          |
| <i>Slc32a1</i> (VGAT)                | 54.50 ± 0.963         | 52.89 ± 2.777           | 0.959          |
| <i>decarboxylase</i>                 |                       |                         |                |
| <i>Gad2</i> (GAD65)                  | 42.16 ± 0.335         | 41.73 ± 0.471           | 0.484          |
| <i>Gad1</i> (GAD67)                  | 126.4 ± 2.821         | 121.1 ± 2.244           | 0.971          |
| <i>receptor</i>                      |                       |                         |                |
| <i>Gabra1</i> (GABA <sub>A</sub> α1) | 81.84 ± 0.781         | 77.84 ± 1.421           | 0.745          |
| <i>Gabrb1</i> (GABA <sub>A</sub> β1) | 10.99 ± 1.424         | 10.87 ± 0.356           | 0.914          |
| <i>Gabrg1</i> (GABA <sub>A</sub> γ1) | 5.676 ± 0.344         | 5.453 ± 0.174           | 0.552          |
| <i>Gabbr1</i> (GABA <sub>B</sub> 1)  | 142.4 ± 1.935         | 140.4 ± 1.432           | 0.068          |
| <i>Gabbr2</i> (GABA <sub>B</sub> 2)  | 54.28 ± 1.297         | 53.96 ± 0.659           | 0.295          |

Mean FPKM values are calculated from 3 mice. Data are presented as the mean ± s.e.m.

Note that *P* value is not corrected.

**Supplementary Table 2. Expression of excitatory neuronal markers in the mouse cortex.**

| <b>Gene</b>                 | <b>WT (mean FPKM)</b> | <b>Df/+ (mean FPKM)</b> | <b>P value</b> |
|-----------------------------|-----------------------|-------------------------|----------------|
| <i>transporter</i>          |                       |                         |                |
| <i>Slc17a7</i> (VGLUT1)     | 342.4 ± 2.614         | 346.3 ± 9.265           | 0.067          |
| <i>Slc17a6</i> (VGLUT2)     | 18.46 ± 1.111         | 17.76 ± 0.380           | 0.820          |
| <i>Slc17a8</i> (VGLUT3)     | 0.981 ± 0.061         | 0.872 ± 0.040           | 0.189          |
| <i>glutamine synthetase</i> |                       |                         |                |
| <i>Glul</i>                 | 475.6 ± 25.85         | 430.6 ± 9.038           | 0.375          |
| <i>receptor</i>             |                       |                         |                |
| <i>Gria1</i> (GluA1)        | 75.03 ± 0.950         | 76.99 ± 0.355           | 0.102          |
| <i>Gria2</i> (GluA2)        | 91.46 ± 6.512         | 97.87 ± 4.338           | 0.325          |
| <i>Grin1</i> (GluN1)        | 120.7 ± 1.756         | 126.1 ± 2.951           | <b>0.006</b>   |
| <i>Grin2a</i> (GluN2A)      | 8.728 ± 1.349         | 10.81 ± 0.054           | 0.271          |
| <i>Grin2b</i> (GluN2B)      | 8.021 ± 1.996         | 10.63 ± 0.922           | 0.348          |

Mean FPKM values are calculated from 3 mice. Data are presented as the mean ± s.e.m.

Note that *P* value is not corrected.

a

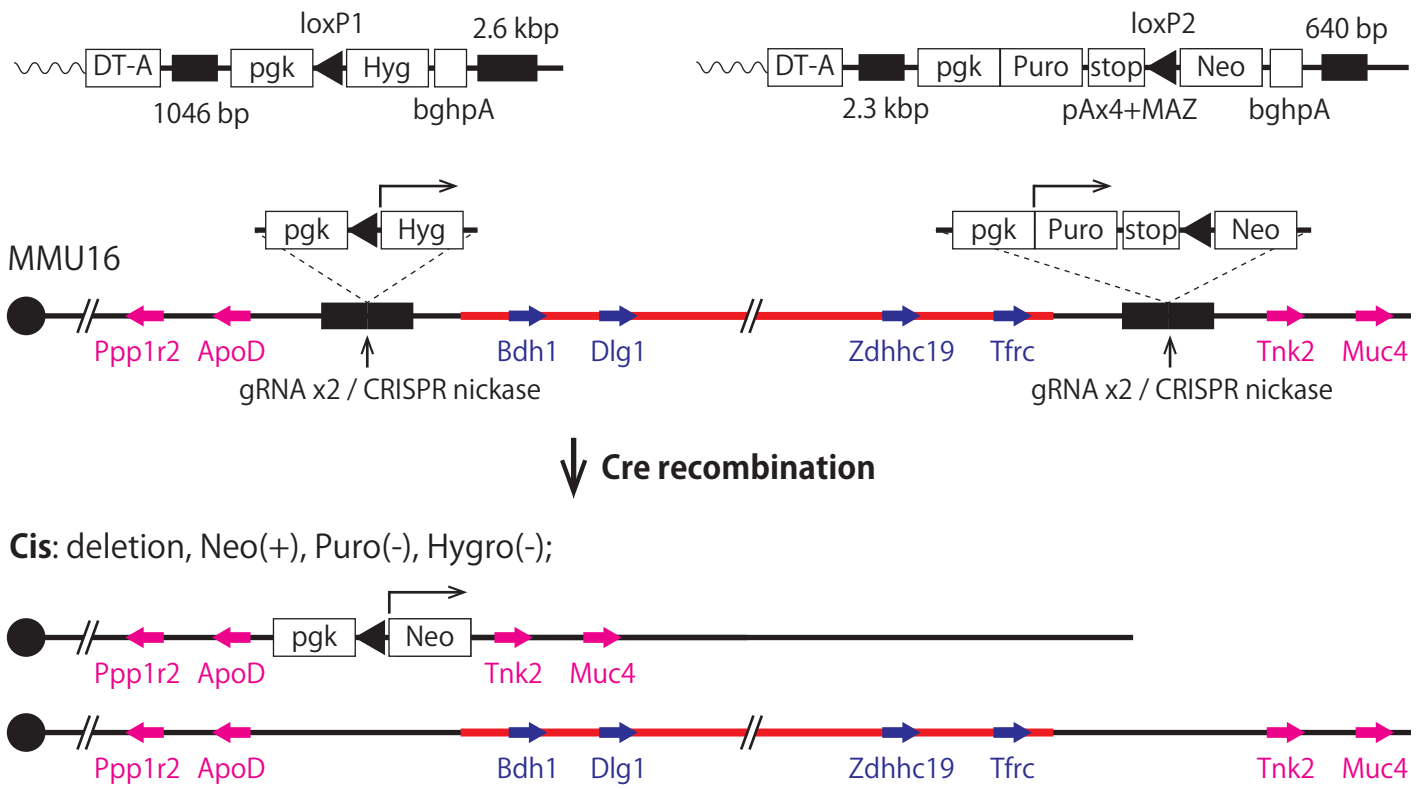

b

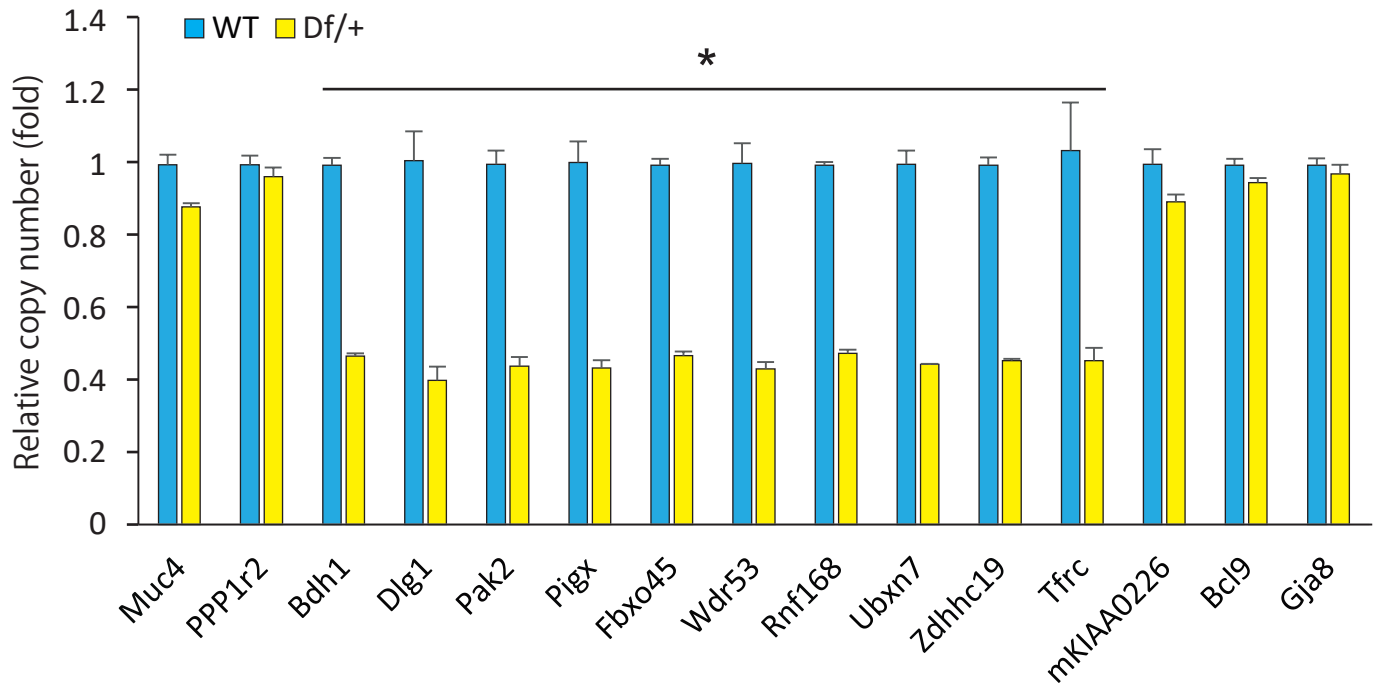

Supplementary Figure 1. Baba et al.

1 **Supplementary Fig. 1** Generation and characterization of Df/+ mice. **a** Schematic of the  
2 strategy used to generate Df/+ mice. For details, see Materials and Methods. **b** Decreased  
3 genomic copy number of the *Bdh1-Tfrc* region in Df/+ mice. Copy number analysis of the  
4 *Bdh1-Tfrc* region was performed by genomic qPCR analysis.
